# Supplementary material for: CNTs–C@TiO2 composites with 3D networks as anode material for lithium/sodium ion batteries
Source: Springer Nature journal article supplement (doi:10.1007/s10853-018-2814-2), 2018-08-20
Supplement: MOESM1 [file 16059638]

Electronic Supplementary Information

**CNTs-C@TiO2 composites with 3D networks as anode material for lithium/sodium ion batteries**

Jin Chen1, Enqi Wang2, Jiechen Mu1, Bing Ai1, Tiezhu Zhang1, Wenqing Ge1, Lipeng Zhang1,*

1 *School of Chemistry and Chemical Engineering,* *Shandong University of Technology, Zibo, 255049,Shandong Province, People’s Republic of China*

2*Shandong Yateer Group Co., Ltd., Jinan, 250011, Shandong Province, People’s Republic of China*


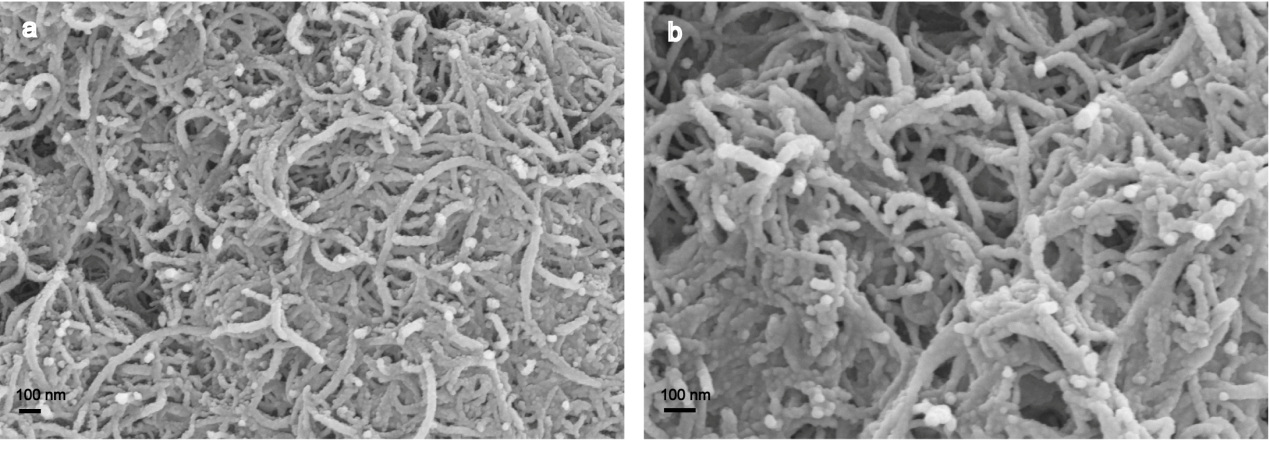


**Figure S1** FESEM images of CNTs before (a) and after (b) acid treated.

**Figure S2** (a) Nitrogen sorption isotherms for the CNTs-C@TiO2 composites, (b) FTIR spectra of CNTs after acid treated.

**Figure S3** (a) CV curves and (b) rate capability and (c) cycling performance and Coulombic efficiency of pure CNTs, (d) Discharge-charge profiles of the CNTs-C@TiO2 composites in the first three cycles for LIBs.

**Figure S4** (a) CV curves and (b) rate capability and (c) cycling performance and Coulombic efficiency of pure CNTs, (d) Discharge-charge profiles of the CNTs-C@TiO2 composites in the first three cycles for SIBs.


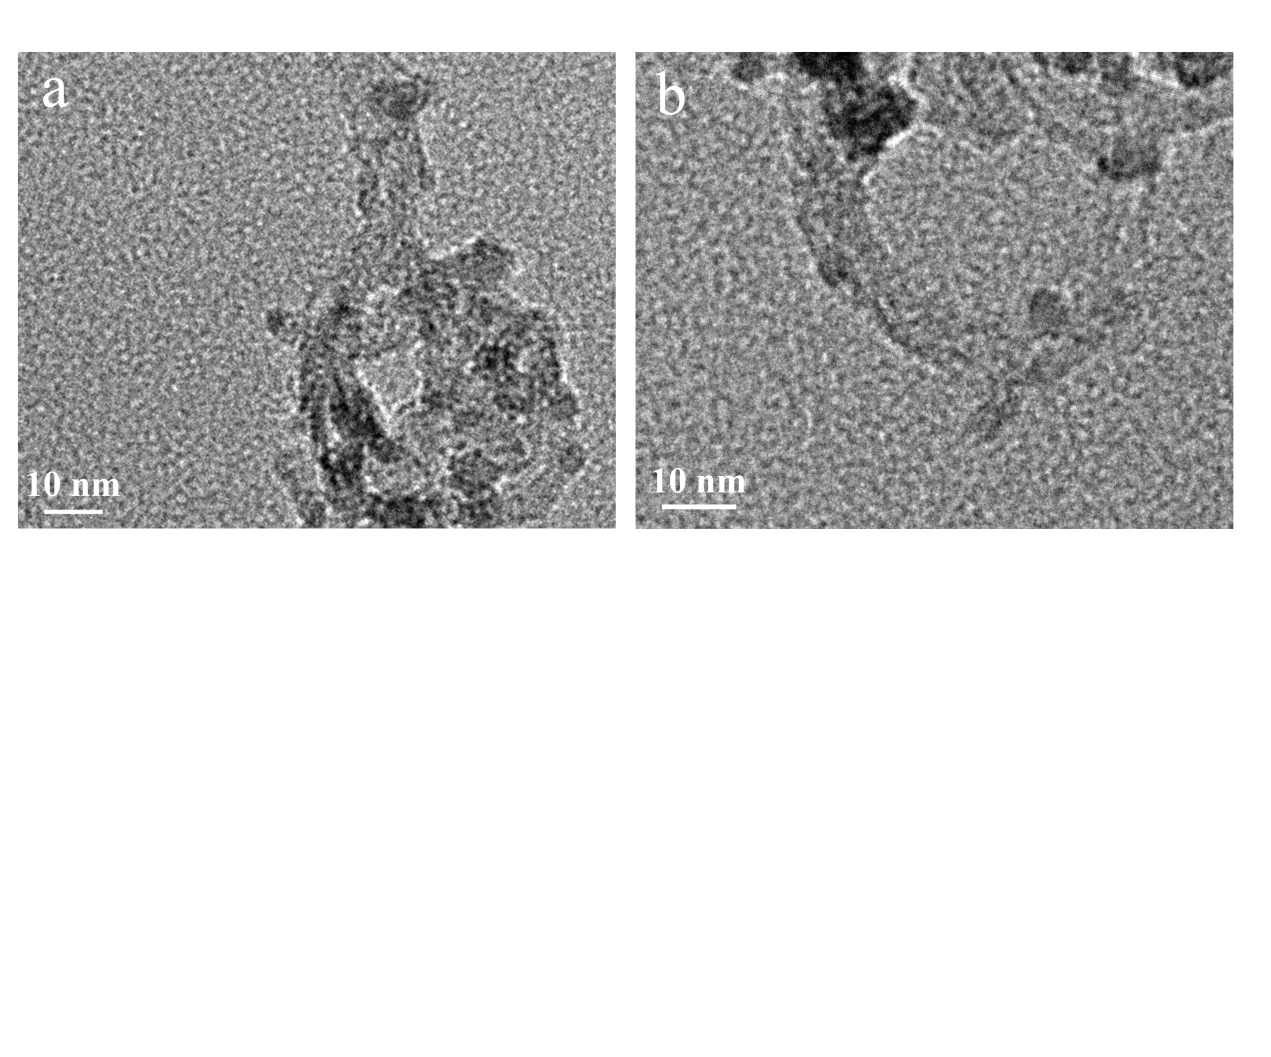


**Figure S5** TEM images (a-b) of the CNTs-C@TiO2 anode material after 50 cycles.
